# Supplementary material for: Short-term strength and balance training does not improve quality of life but improves functional status in individuals with diabetic peripheral neuropathy: a randomised controlled trial
Source: PubMed Central journal article supplement (PMC6861346; doi:10.1007/s00125-019-04979-7), 2019-08-29

ESM Table 1. Demographic and clinical characteristics of study participants at baseline

| Characteristic                                                | Intervention<br>(n = 70) | Control<br>(n = 73)      | All patients<br>(n = 143) |
|---------------------------------------------------------------|--------------------------|--------------------------|---------------------------|
| <b>Age (years)</b>                                            |                          |                          |                           |
| Mean                                                          | 61.9                     | 62.3                     | 62.1                      |
| Range                                                         | 47.6 – 78.4              | 43.2 – 78.4              | 43.2 – 78.4               |
| <b>Gender (%)</b>                                             |                          |                          |                           |
| Male                                                          | 36 (51.4)                | 27 (37.0)                | 63 (44.1)                 |
| Female                                                        | 34 (48.6)                | 46 (63.0)                | 80 (55.9)                 |
| <b>Ethnicity (%)</b>                                          |                          |                          |                           |
| South Asian                                                   | 56 (80.0)                | 54 (74.0)                | 110 (76.9)                |
| Other                                                         | 14 (20.0)                | 19 (26.0)                | 33 (23.1)                 |
| <b>Currently married (%)</b>                                  | 50 (71.4)                | 44 (60.3)                | 94 (65.7)                 |
| <b>At least secondary education (%)</b>                       | 33 (47.1)                | 37 (50.7)                | 70 (49.0)                 |
| <b>Employed (%)</b>                                           | 34 (48.6)                | 32 (43.8)                | 66 (46.2)                 |
| <b>Monthly household income ≥ \$2,000 (%) *</b>               | 15 (26.3)                | 14 (26.4)                | 29 (26.4)                 |
| <b>Housing type (%)</b>                                       |                          |                          |                           |
| 1–2 room                                                      | 33 (54.1)                | 32 (50.8)                | 65 (52.4)                 |
| 3–4 room                                                      | 28 (45.9)                | 29 (46.0)                | 57 (46.0)                 |
| 5-room or above                                               | 0 (0.0)                  | 1 (1.6)                  | 1 (0.8)                   |
| <b>Diabetes duration (years)</b>                              | 13.8 (10.3)              | 16.8 (11.1)              | 15.3 (10.7)               |
| <b>Other comorbidities</b>                                    |                          |                          |                           |
| Hypertension                                                  | 46 (65.7)                | 54 (74.0)                | 100 (69.9)                |
| Hypercholesterolemia                                          | 45 (64.3)                | 52 (71.2)                | 97 (67.8)                 |
| Heart disease                                                 | 19 (27.1)                | 14 (19.2)                | 33 (23.1)                 |
| Kidney disease                                                | 1 (1.4)                  | 2 (2.7)                  | 3 (2.1)                   |
| Stroke                                                        | 2 (2.9)                  | 5 (6.8)                  | 7 (4.9)                   |
| Peripheral arterial disease                                   | 4 (5.7)                  | 6 (8.2)                  | 10 (7.0)                  |
| Retinopathy                                                   | 20 (28.6)                | 26 (35.6)                | 46 (32.2)                 |
| Arthritis                                                     | 8 (11.4)                 | 8 (11.0)                 | 16 (11.2)                 |
| <b>Michigan Neuropathy Screening Instrument history score</b> |                          |                          |                           |
| ≥7                                                            | 2 (2.9)                  | 2 (2.7)                  | 4 (2.8)                   |
| ≥4                                                            | 23 (32.9)                | 31 (42.5)                | 54 (37.8)                 |
| <b>On DPN medication, n (%)</b>                               | 2 (2.9)                  | 3 (4.1)                  | 5 (3.5)                   |
| <b>Falls in the past 4 weeks, n (%)</b>                       | 1 (1.4)                  | 3 (4.1)                  | 4 (2.8)                   |
| <b>Mean BMI, kg/m<sup>2</sup> (SD)</b>                        | 28.4 (5.6)               | 28.4 (5.9)               | 28.4 (5.7)                |
| <b>Baseline HbA1c (mmol/mol) [%]</b>                          | 67 (19.7) [8.3<br>(1.8)] | 70 (19.7) [8.6<br>(1.8)] | 69 (19.7) [8.5<br>(1.8)]  |
| <b>HbA1c at 2-month (mmol/mol) [%]</b>                        | 64 (17.5) 8.0<br>(1.6)   | 68 (18.6) [8.4<br>(1.7)] | 66 (18.6) [8.2<br>(1.7)]  |
| <b>HbA1c at 6-month (mmol/mol) [%]</b>                        | 66 (17.5)[8.2<br>(1.6)]  | 70 (23.0) [8.6<br>(2.1)] | 68 (19.7) [8.4<br>(1.8)]  |

\* Thirty-three observations with missing monthly household income.

**ESM Table 2. Association between HRQoL and functional status among intervention group**

| Characteristic                                | Effect estimate | 95% CI           | p-value |
|-----------------------------------------------|-----------------|------------------|---------|
| <b>Timed up and go (seconds)</b>              |                 |                  |         |
| Model 1                                       | -0.017          | (-0.025, -0.009) | <0.001  |
| Model 2                                       | -0.015          | (-0.023, -0.006) | 0.001   |
| <b>Five times Sit-to-stand (seconds)</b>      |                 |                  |         |
| Model 1                                       | -0.011          | (-0.019, -0.003) | 0.010   |
| Model 2                                       | -0.006          | (-0.015, 0.003)  | 0.170   |
| <b>Functional reach (cm)</b>                  |                 |                  |         |
| Model 1                                       | -0.003          | (-0.007, 0.002)  | 0.260   |
| Model 2                                       | -0.002          | (-0.006, 0.003)  | 0.397   |
| <b>Total ABC score (%)</b>                    |                 |                  |         |
| Model 1                                       | 0.004           | (0.003, 0.006)   | <0.001  |
| Model 2                                       | 0.003           | (0.002, 0.005)   | <0.001  |
| <b>Body sway velocity, eyes closed (mm/s)</b> |                 |                  |         |
| Model 1                                       | -0.027          | (-0.066, 0.012)  | 0.174   |
| Model 2                                       | -0.007          | (-0.045, 0.031)  | 0.720   |
| <b>Muscle strength, right ankle (N)</b>       |                 |                  |         |
| Model 1                                       | 0.001           | (-0.0004, 0.003) | 0.140   |
| Model 2                                       | 0.0002          | (-0.002, 0.002)  | 0.921   |
| <b>Range of motion, right ankle (degrees)</b> |                 |                  |         |
| Model 1                                       | -0.002          | (-0.004, 0.001)  | 0.208   |
| Model 2                                       | -0.001          | (-0.004, 0.001)  | 0.360   |
| <b>Range of motion, right knee (degrees)</b>  |                 |                  |         |
| Model 1                                       | 0.002           | (0.001, 0.004)   | 0.014   |
| Model 2                                       | 0.001           | (0, 0.003)       | 0.143   |

ABC: activities-based balance confidence

Dependent variable: EQ-5D-5L index score

Note: Model 1 – GEE with gaussian distribution and unstructured correlation, adjusted with baseline measurement of functional status.

Model 2 – GEE with gaussian distribution and unstructured correlation, adjusted for time, baseline measurement of functional status and gender.

ESM Fig. 1. CONSORT diagram of participant flow

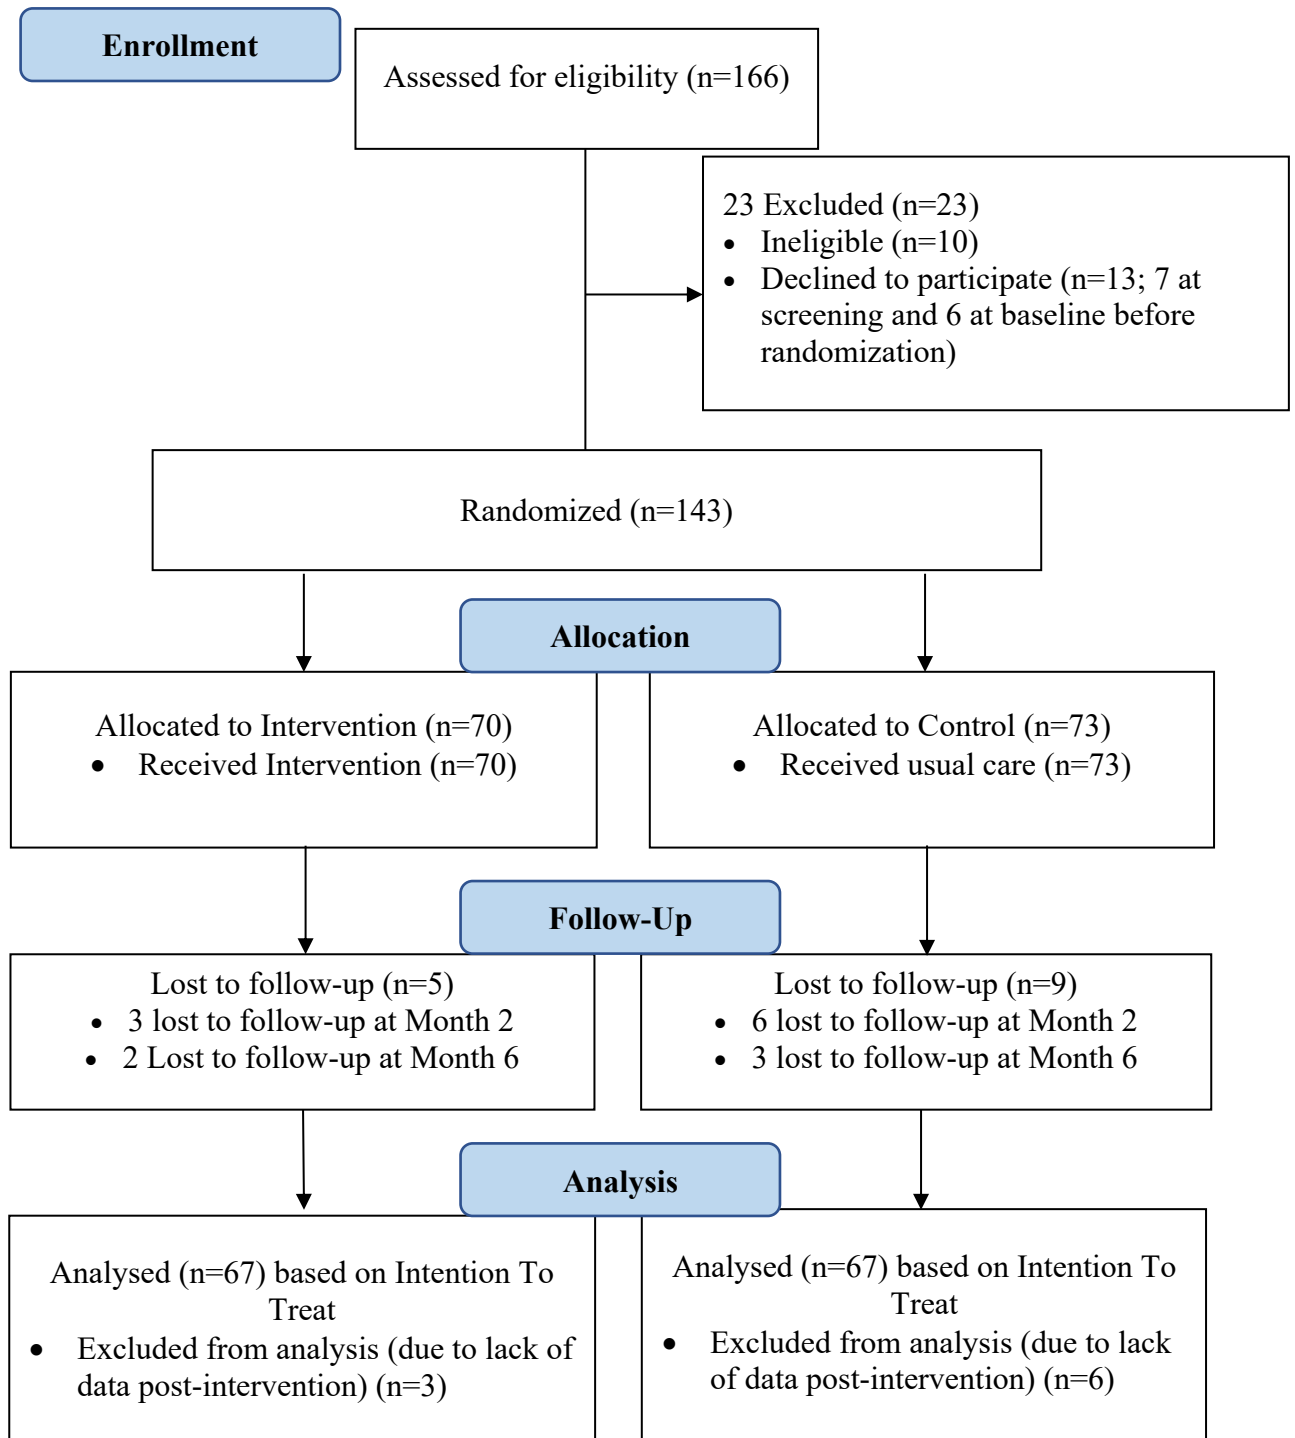

Supplement: 125_2019_4979_MOESM1_ESM.pdf [file 125_2019_4979_MOESM1_ESM.pdf]
